# Supplementary material for: “ON–OFF–ON” fluorescent probes based on nitrogen-doped carbon dots for hypochlorite and bisulfite detection in living cells
Source: Royal Society of Chemistry journal article supplement (doi:10.1039/c8an01585f), 2018-01-01
Supplement: c8an01585f1.pdf [file c8an01585f1.pdf]

“On-off-on” fluorescent probes based on nitrogen-doped carbon dots  
for hypochlorite and bisulfite detection in living cells

*Ruoming Wang<sup>a</sup>, Ruixia, Wang<sup>a</sup>, Dongyan, Ju<sup>a</sup>, Wei Lu<sup>a, b</sup>, Chunzhu, Jiang<sup>a</sup>, Xueru  
Shan<sup>a</sup>, Qian Chen<sup>a</sup>, Guoying Sun<sup>a, b\*</sup>*

<sup>a</sup> *School of Chemistry and Life Science, Changchun University of Technology, 2055  
Yanan Street, Changchun 130012, P. R. China*

<sup>b</sup> *Advanced Institute of Materials Science, Changchun University of Technology, 2055  
Yanan Street, Changchun 130012, P. R. China*

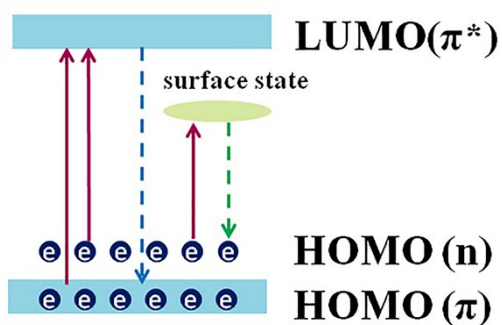

**Figure.S1** Illustration of the tunable PL emission from surface state of N-CDs.

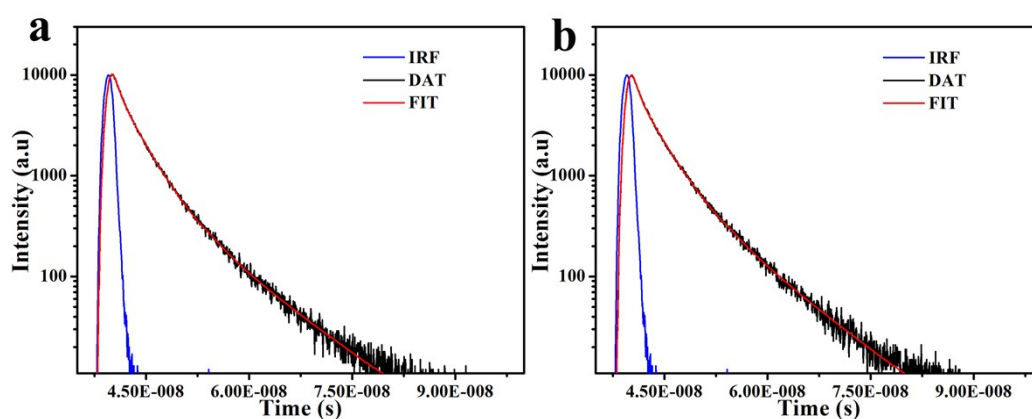

**Figure.S2** (a) Fluorescence lifetime of N-CDs, (b) Fluorescence lifetime of N-CDs with  $\text{ClO}^-$ .

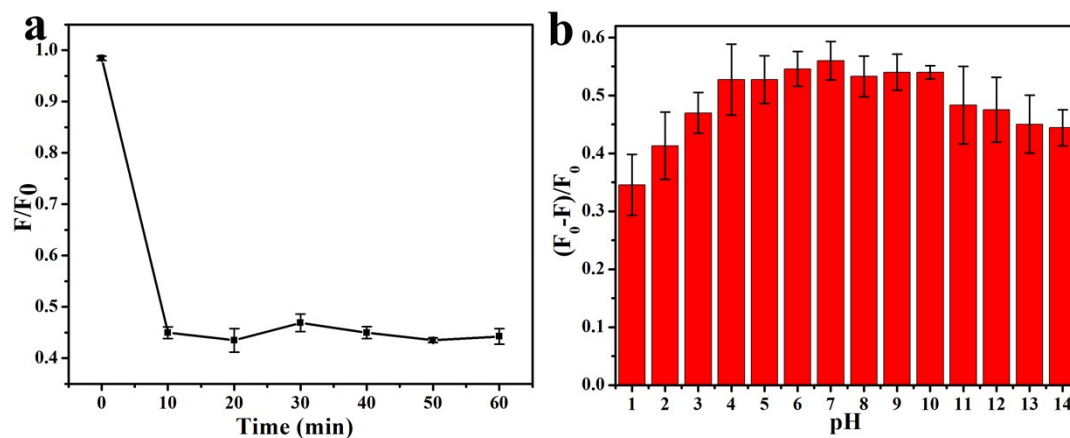

**Figure.S3** (a) Response time of the N-CDs with  $\text{ClO}^-$ , (b) pH-dependent of the N-CDs with  $\text{ClO}^-$ .

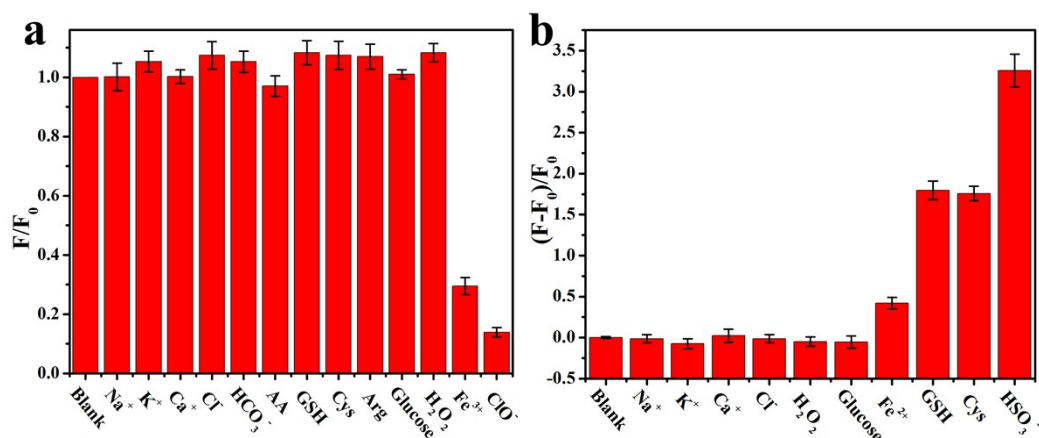

**Figure .S4** (a) Selective PL response of N-CDs aqueous solution towards  $\text{ClO}^-$ . (b) Selectivity of N-CDs / $\text{ClO}^-$  to  $\text{HSO}_3^-$ .

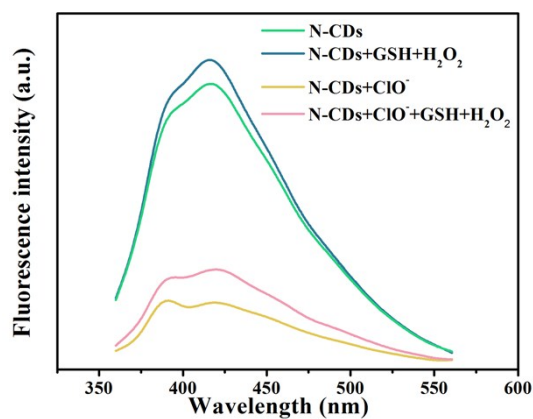

**Figure .S5** Fluorescence spectra of N-CDs (green), N-CDs+GSH+ $\text{H}_2\text{O}_2$  (blue), N-CDs+ $\text{ClO}^-$  (brown) and N-CDs+ $\text{ClO}^-$ + $\text{H}_2\text{O}_2$ +GSH (pink)

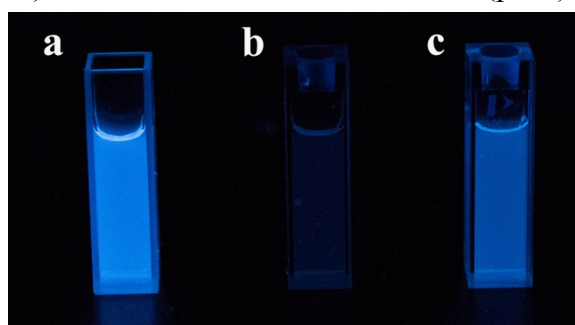

**Figure S6** (a) The photo of N-CDs fluorescence, (b) N-CDs fluorescence quenched by  $\text{ClO}^-$ , (c) N-CDs fluorescence recovered by  $\text{HSO}_3^-$ .

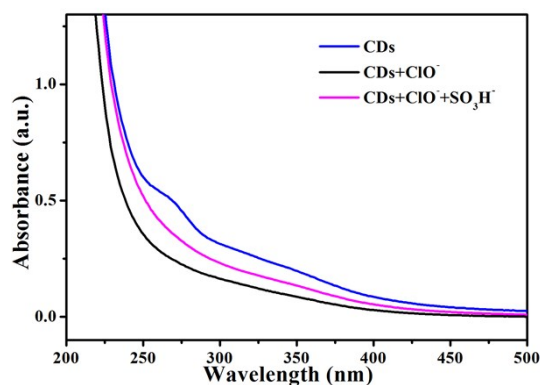

**Figure.S7** UV-vis absorption of N-CDs (blue), N-CDs with ClO<sup>-</sup> (black) and N-CDs with ClO<sup>-</sup> and HSO<sub>3</sub><sup>-</sup> (pink).

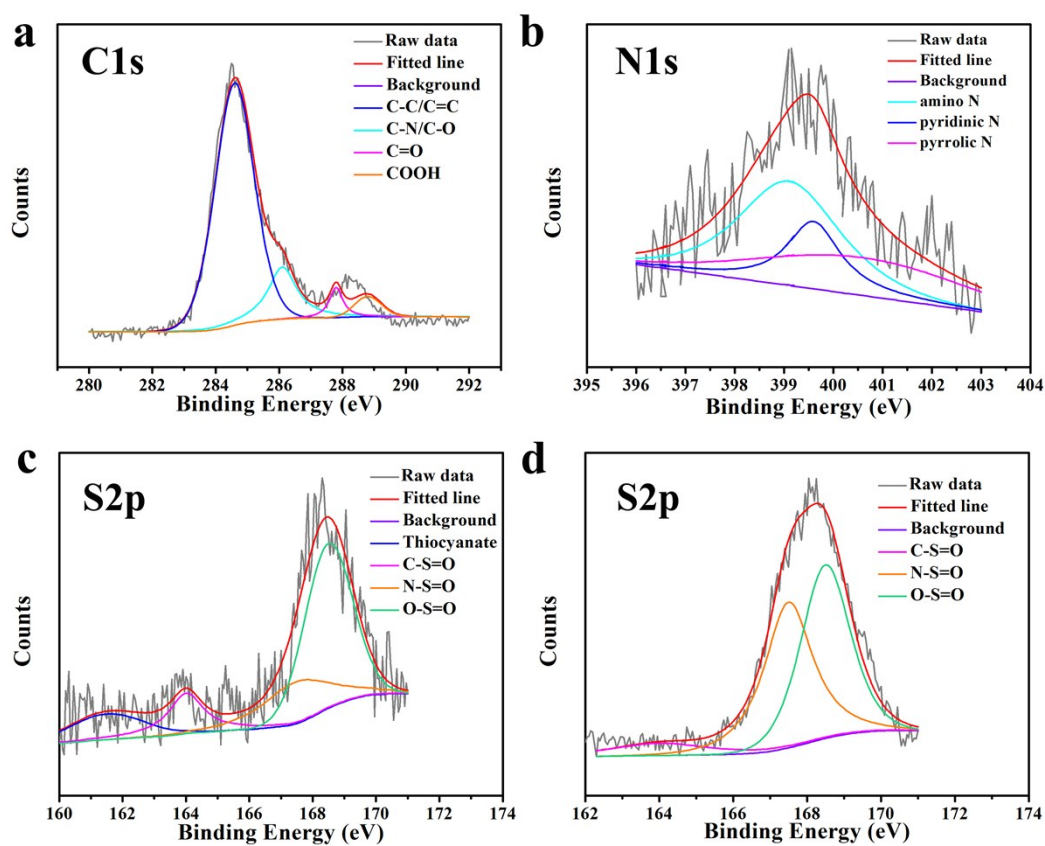

**Figure.S8** (a) High-resolution XPS C1s, (b) N1s and (c) S2p of N-CDs with ClO<sup>-</sup> S2p, (d) S2p of N-CDs/ClO<sup>-</sup> with HSO<sub>3</sub><sup>-</sup>.
